# Supplementary material
Source: Royal Society of Chemistry journal article supplement (doi:10.1039/d5nr05002b)
Supplement: d5nr05002b1.pdf [file d5nr05002b1.pdf]

**Mass spectral molecular mapping shows benefits of thermal evaporation in prelithiated silicon-based composite electrodes**

**Gabriel D. Parker**<sup>1</sup>, **Amanda L. Musgrove**<sup>2</sup>, **Gabriel M. Veith**<sup>2</sup>, **Ivan Matyushov**<sup>1</sup>, and **Xiao-Ying Yu**<sup>1,†</sup>

<sup>1</sup> Materials Science and Technology Division, Oak Ridge National Laboratory; matyushovid@ornl.gov, parkergd@ornl.gov

<sup>2</sup> Chemical Sciences Division, Oak Ridge National Laboratory; musgroveal@ornl.gov, veithgm@ornl.gov

† Correspondence: [yuxiaoying@ornl.gov](mailto:yuxiaoying@ornl.gov)

## Contents

|                                                                                                                                                                                                                                                                                                                                                                                                                                                                                                                                                                                                                              |     |
|------------------------------------------------------------------------------------------------------------------------------------------------------------------------------------------------------------------------------------------------------------------------------------------------------------------------------------------------------------------------------------------------------------------------------------------------------------------------------------------------------------------------------------------------------------------------------------------------------------------------------|-----|
| Supporting Figures .....                                                                                                                                                                                                                                                                                                                                                                                                                                                                                                                                                                                                     | S4  |
| <b>Figure S1.</b> Calibrated SIMS spectra showing reproducibility of SIMS analysis of the inert Ar gas sample in the $m/z^-$ of 0-100 in the negative ion mode. ....                                                                                                                                                                                                                                                                                                                                                                                                                                                         | S4  |
| <b>Figure S2.</b> Calibrated SIMS spectra showing reproducibility of SIMS analysis of the inert Ar gas sample in the $m/z^-$ of 100-200 in the negative ion mode. ....                                                                                                                                                                                                                                                                                                                                                                                                                                                       | S5  |
| <b>Figure S3.</b> Calibrated SIMS spectra showing reproducibility of SIMS analysis of the inert Ar gas sample in the $m/z^-$ of 200-400 in the negative ion mode. ....                                                                                                                                                                                                                                                                                                                                                                                                                                                       | S6  |
| <b>Figure S4.</b> ToF-SIMS mass spectra collected in the negative ion mode within mass range $m/z^-$ 0-100 for prelithiated silicon electrodes housed in Ar + CO <sub>2</sub> environment (a), Ar environment (b), and no prelithiation silicon electrode control sample (c). This mass region shows identifications of LiSi <sub>2</sub> <sup>-</sup> , LiSiO <sub>2</sub> <sup>-</sup> , and LiSiO <sub>3</sub> <sup>-</sup> peaks found in the prelithiated samples. ....                                                                                                                                                 | S7  |
| <b>Figure S5.</b> ToF-SIMS mass spectra reconstructed after depth profiling within positive mode showing $m/z^+$ 0-100 for prelithiated silicon composite electrodes in exposure to Ar/CO <sub>2</sub> environment (a) and an inert Ar environment (b) compared against no prelithiation silicon electrodes(c).....                                                                                                                                                                                                                                                                                                          | S8  |
| <b>Figure S6.</b> Normalized ToF-SIMS spectra of silicon electrodes with no prelithiation and prelithiation within an Ar/CO <sub>2</sub> environment. (a) Spectra highlighting $m/z^-$ 0-50 showing lithium, lithium-silicon, and other products of the electrodes. (b) Peak comparison of the lithium observed with no pre-lithiation and after prelithiation. (c) Peak comparison of lithium-silicate with no prelithiation and after prelithiation. ....                                                                                                                                                                  | S9  |
| <b>Figure S7.</b> Normalized ToF-SIMS spectra of silicon electrodes with no prelithiation (black) and prelithiation within an Ar/CO <sub>2</sub> environment (red) using the CsM <sup>+</sup> ionization method. (a) Spectra in the $m/z^-$ of 130-200 showing cesium, cesium -lithium, cesium -silicon, and cesium -lithium-silicon products of the electrodes. (b) Peak comparison of the lithium observed with no pre-lithiation and after prelithiation using the CsM <sup>+</sup> method. (c) Peak comparison of lithium-silicate with no prelithiation and after prelithiation using the CsM <sup>+</sup> method. .... | S10 |
| <b>Figure S8.</b> Red, green, blue overlay of SiH <sup>-</sup> , O <sub>2</sub> <sup>-</sup> , and LiO <sub>2</sub> <sup>-</sup> /LiSi <sub>2</sub> <sup>-</sup> /LiSiO <sub>2</sub> <sup>-</sup> showing negative areas in the images to be occupied by oxygen in the Ar gas environment prepared electrode sample. ....                                                                                                                                                                                                                                                                                                    | S11 |
| <b>Figure S9.</b> SIMS 2D images in the positive ion mode of electrodes prepared in argon gas environment (a) and Ar/CO <sub>2</sub> gas exposure (b). The analysis area is 300 μm x 300 μm. Their respective intensity scaling is to the right. ....                                                                                                                                                                                                                                                                                                                                                                        | S12 |
| <b>Figure S10.</b> Depth profile plots of sample electrodes with no prelithiation in the negative mode (a) and positive mode (b).....                                                                                                                                                                                                                                                                                                                                                                                                                                                                                        | S13 |
| <b>Figure S11.</b> ToF-SIMS depth profiles and overlaying reconstructed 3D SIMS images of the prelithiated electrode materials after exposure to an inert Ar gas environment (a, b) and an Ar/CO <sub>2</sub> gas environment (c, d) in the positive ion mode. Total sputtering depth was 400 nm. Sputtering done at 0.16 nm/s. The same colors are used for identified ions in the depth profiles and 3D images. ....                                                                                                                                                                                                       | S14 |
| <b>Figure S12.</b> Negative polarity fast images of the anode sample surface for no prelithiation sample and Ar/CO <sub>2</sub> Environment sample showing Li, Si, and LiSi normalized to Total Ion Image within an area of 500 μm × 500 μm. ....                                                                                                                                                                                                                                                                                                                                                                            | S15 |
| <b>Figure S13.</b> Positive polarity fast images of the anode sample surface for no prelithiation sample and Ar/CO <sub>2</sub> Environment sample showing Li and Si normalized to Total Ion Image within an area of 500 μm × 500 μm. ....                                                                                                                                                                                                                                                                                                                                                                                   | S16 |

**Figure S14.** ToF-SIMS spectra showing Ar/CO<sub>2</sub> anode sample surface spectra (black) and depth profile spectra (red) to examine potential lithium carbonate peak identification. (a) Spectra observes Li<sup>-</sup>. (b) Spectra observed Li<sub>2</sub>CO<sub>3</sub><sup>-</sup> with a higher mass deviation for depth profile spectra. (c) Spectra observes prominent lithium carbonate fragment LiCO<sub>3</sub><sup>-</sup> is not readily observed in the depth profiling spectra.....S17

**Supporting Tables.....S19**

**Table S1:** Peak identifications for electrodes in inert Ar gas environment in mass range of  $m/z^- 0 - 200$  in the negative mode. ....S19

**Table S2:** Peak identifications for electrodes in Ar/CO<sub>2</sub> gas environment in mass range of  $m/z^- 0 - 200$  in the negative mode. ....S20

**Table S3:** Peak identifications for electrodes with no prelithiation done in mass range of  $m/z^- 0 - 200$  in the negative mode. ....S21

**Table S4:** Peak identifications for electrodes exposed to inert Ar gas environment in mass range of  $m/z^+ 0 - 200$  in the positive mode. ....S22

**Table S5:** Peak identifications for electrodes exposed to Ar/CO<sub>2</sub> gas environment in mass range of  $m/z^+ 0 - 200$  in the positive mode. ....S23

**Table S6:** Peak identifications for electrodes with no prelithiation done in mass range of  $m/z^+ 0 - 200$  in the positive mode. ....S24

**References.....S25**

## Supporting Figures

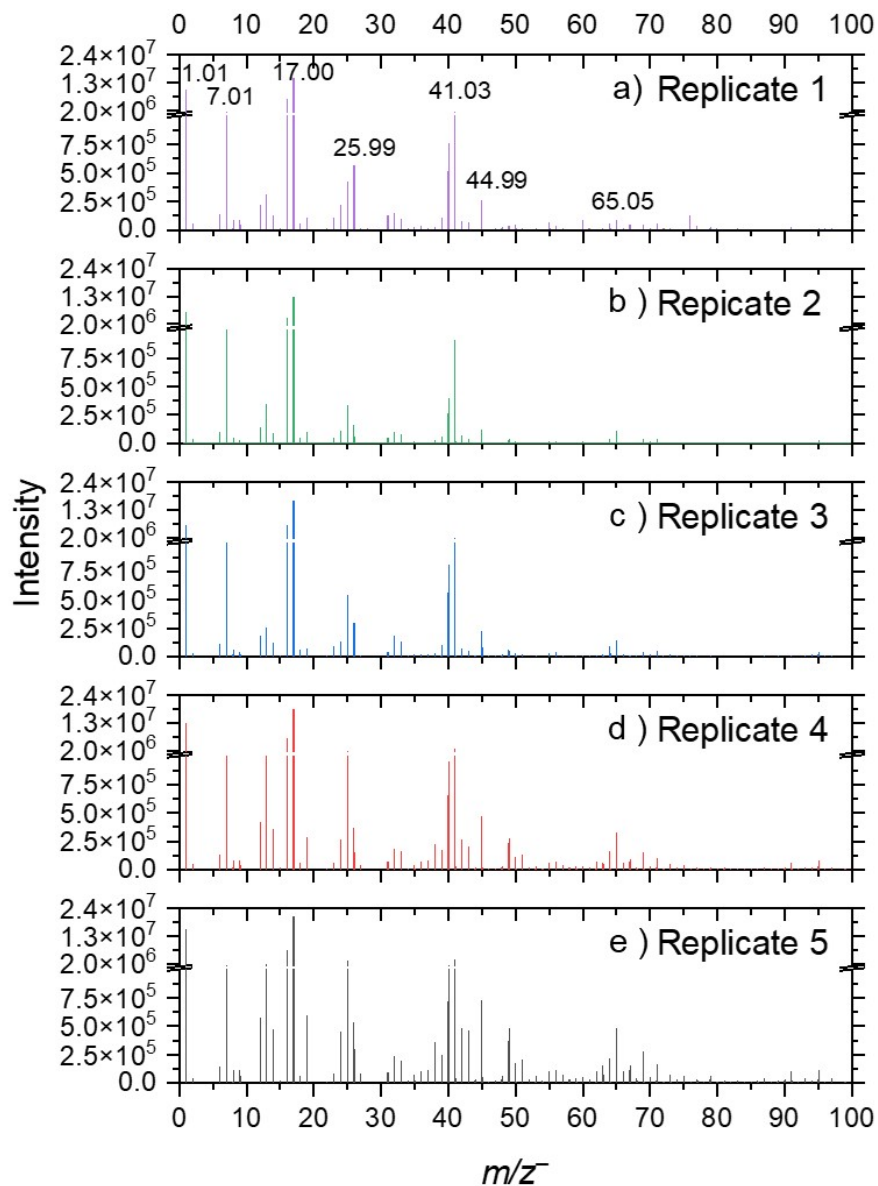

**Figure S1.** Calibrated SIMS spectra showing reproducibility of SIMS analysis of the inert Ar gas sample in the  $m/z^-$  of 0-100 in the negative ion mode.

**Figure S1** depicts an example of static ToF-SIMS spectral measurement reproducibility in the  $m/z^-$  range of 0 – 100 of the spectra in the negative ion mode. Each replicate is numbered 1-5 with each number corresponding to the first, second, third, fourth, and fifth measurements of this particular sample acquired in the negative ion mode consecutively. Other samples studied in this work have similar spectral reproducibility.

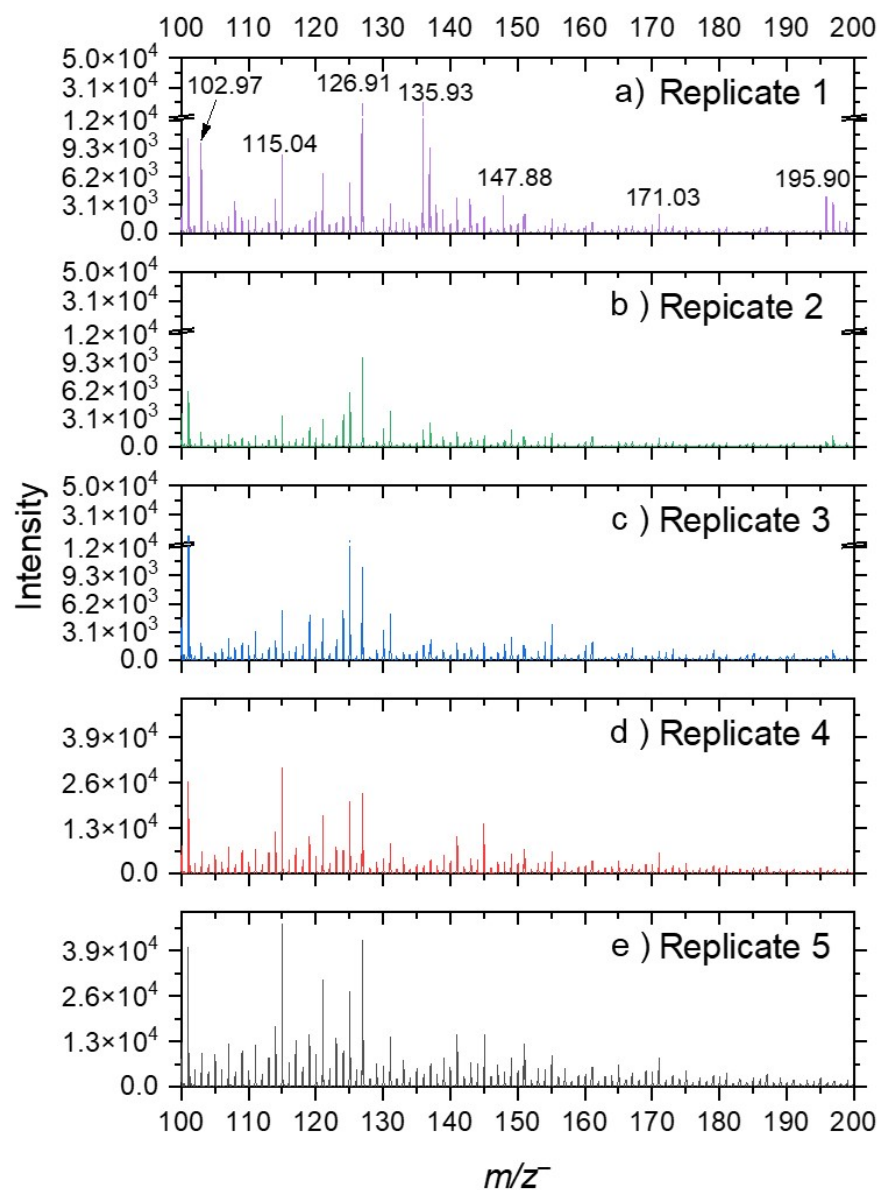

**Figure S2.** Calibrated SIMS spectra showing reproducibility of SIMS analysis of the inert Ar gas sample in the  $m/z^-$  of 100-200 in the negative ion mode.

**Figure S2** depicts an example of static ToF-SIMS spectral measurement reproducibility in the  $m/z^-$  range of 100 – 200 of the spectra in the negative ion mode. Each replicate is numbered 1-5 with each number corresponding to the first, second, third, fourth, and fifth measurements of this particular sample acquired in the negative ion mode consecutively. Other samples studied in this work have similar spectral reproducibility.

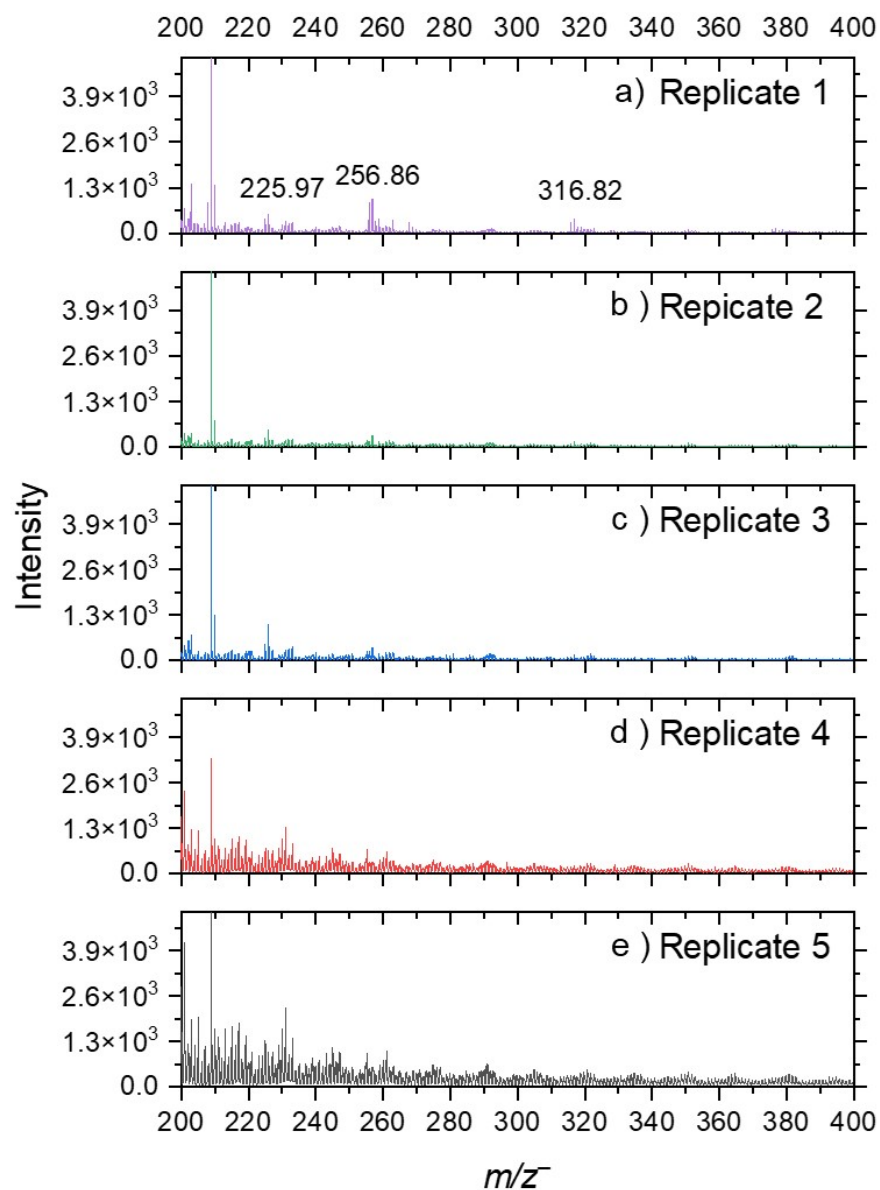

**Figure S3.** Calibrated SIMS spectra showing reproducibility of SIMS analysis of the inert Ar gas sample in the  $m/z^-$  of 200-400 in the negative ion mode.

**Figure S3** depicts an example of static ToF-SIMS spectral measurement reproducibility in the  $m/z^-$  range of 200 – 400 of the spectra in the negative ion mode. Each replicate is numbered 1-5 with each number corresponding to the first, second, third, fourth, and fifth measurements of this particular sample acquired in the negative ion mode consecutively. Other samples studied in this work have similar spectral reproducibility.

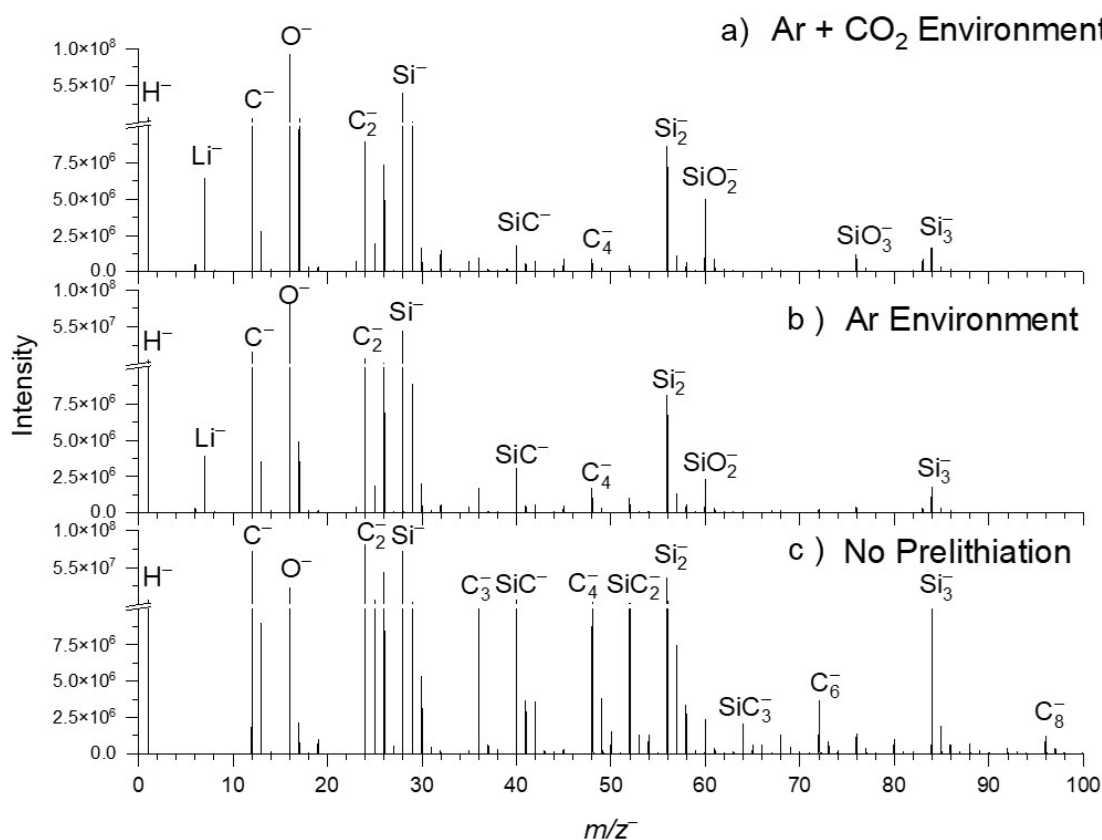

**Figure S4.** ToF-SIMS mass spectra collected in the negative ion mode within mass range  $m/z$  0-100 for prelithiated silicon electrodes housed in Ar + CO<sub>2</sub> environment (a), Ar environment (b), and no prelithiation silicon electrode control sample (c). This mass region shows identifications of LiSi<sub>2</sub><sup>-</sup>, LiSiO<sub>2</sub><sup>-</sup>, and LiSiO<sub>3</sub><sup>-</sup> peaks found in the prelithiated samples.

**Figure S4** shows ToF-SIMS spectra collected for 3 sample times: Ar+CO<sub>2</sub> environment prelithiation conditions (a), Ar environment prelithiation conditions (b), and no prelithiation control samples(c) of the silicon electrodes. This spectral comparison shows many carbon clusters and silicon clusters but due to the high intensity, peaks of interest are not easily recognizable. This mass region shows identifications of LiSi<sub>2</sub><sup>-</sup>, LiSiO<sub>2</sub><sup>-</sup>, and LiSiO<sub>3</sub><sup>-</sup> peaks found in the prelithiated samples. This figure supports **Figure 2** of the main text, which shows a portion of this mass spectra,  $m/z$  50-100. Observed are lithium-silicon/silicate alloy products which indicate lithium penetration within the silicon electrode allowing for metal complexing.

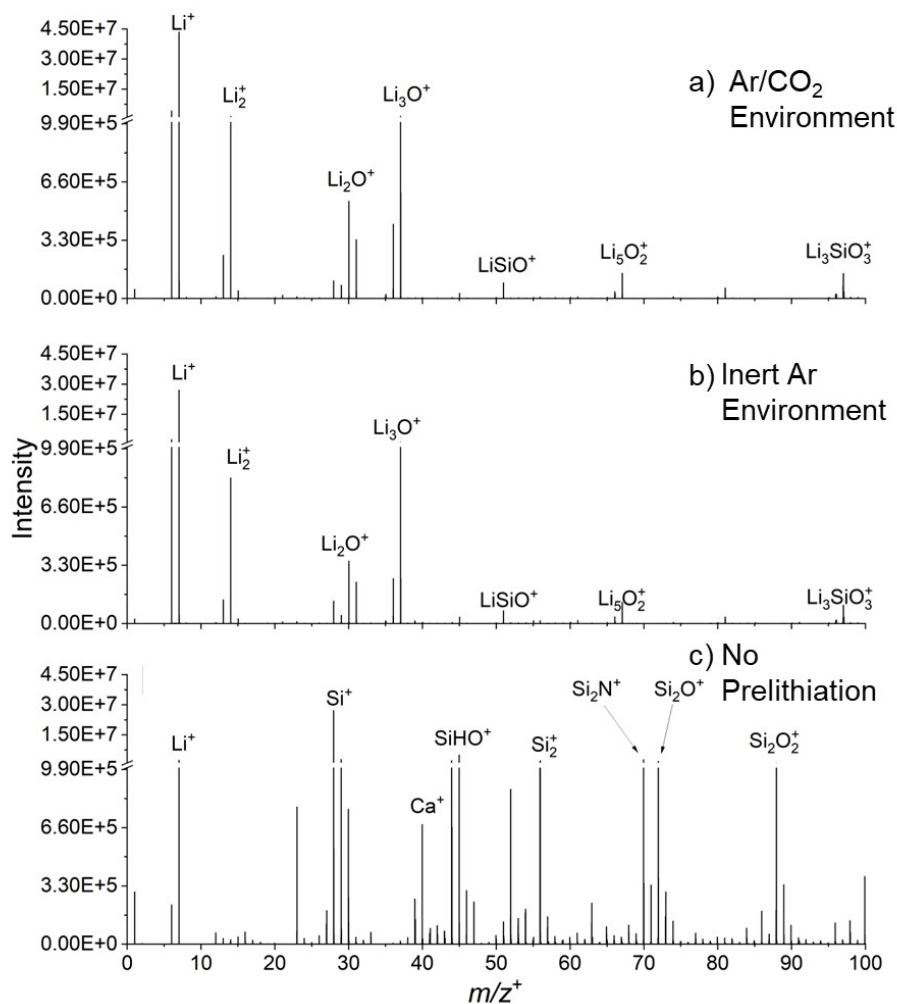

**Figure S5.** ToF-SIMS mass spectra reconstructed after depth profiling within positive mode showing  $m/z^+$  0-100 for prelithiated silicon composite electrodes in exposure to Ar/CO<sub>2</sub> environment (a) and an inert Ar environment (b) compared against no prelithiation silicon electrodes(c).

**Figure S5** shows dynamic ToF-SIMS spectral comparison results from the positive ion mode of the prelithiation prepared Si electrodes in an Ar/CO<sub>2</sub> environment (a), inert Ar environment (b), and control sample with no prelithiation electrodes (c). The SIMS spectral comparisons are in the mass range of  $m/z^+$  0 – 100. In the prelithiated samples, primarily lithium-based compounds show both lithium oxides and lithium silicates as prominent peaks. The non-prelithiated samples primarily see silicon-based compounds strongly.

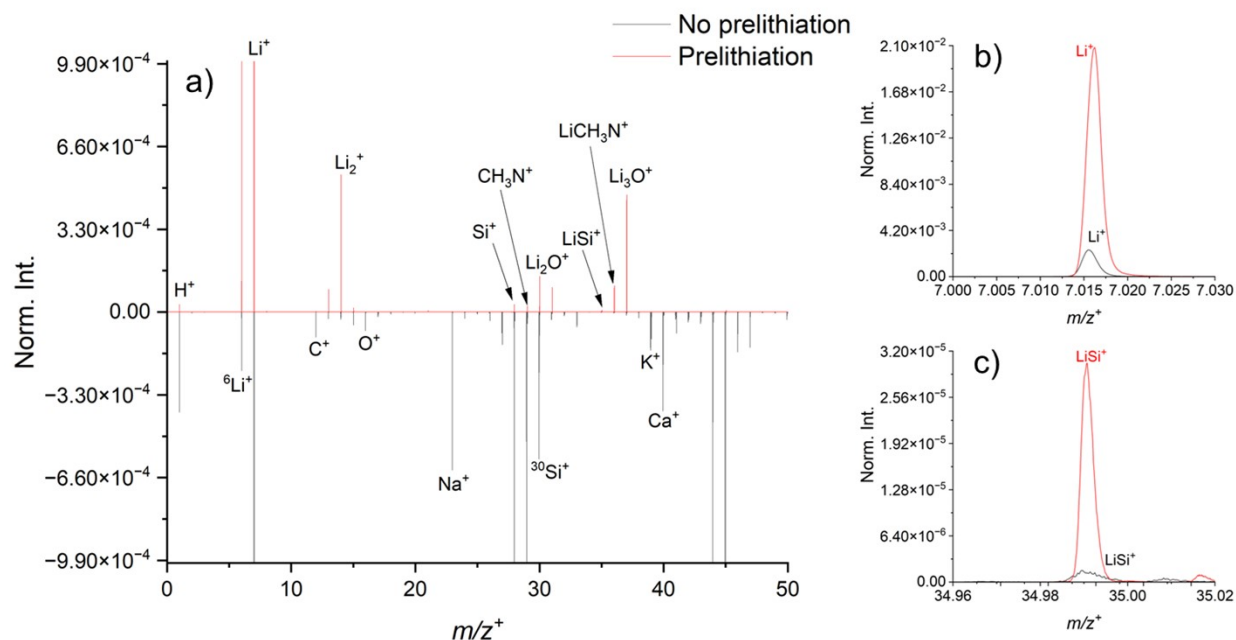

**Figure S6.** Normalized ToF-SIMS spectra of silicon electrodes with no prelithiation and prelithiation within an Ar/CO<sub>2</sub> environment. (a) Spectra highlighting  $m/z$  0-50 showing lithium, lithium-silicon, and other products of the electrodes. (b) Peak comparison of the lithium observed with no pre-lithiation and after prelithiation. (c) Peak comparison of lithium-silicate with no prelithiation and after prelithiation.

**Figure S6** shows normalized ToF-SIMS spectra used for comparing peaks indicative of prelithiated and non-prelithiated silicon electrodes. The results indicate that some lithium is on the surface of the non-prelithiated electrodes, possibly due to manufacturing contamination; however, its count is minimal in comparison with the lithiated sample as shown in **Figure S6b**. Also presented is a small peak identifying lithium-silicon alloy in the non-prelithiated sample depicted in **Figure S6c**. This is most likely an artifact and not a real representation, whereas the prelithiated peak suggests accurate identification of LiSi<sup>+</sup> with a mass deviation of 20.4321 ppm.

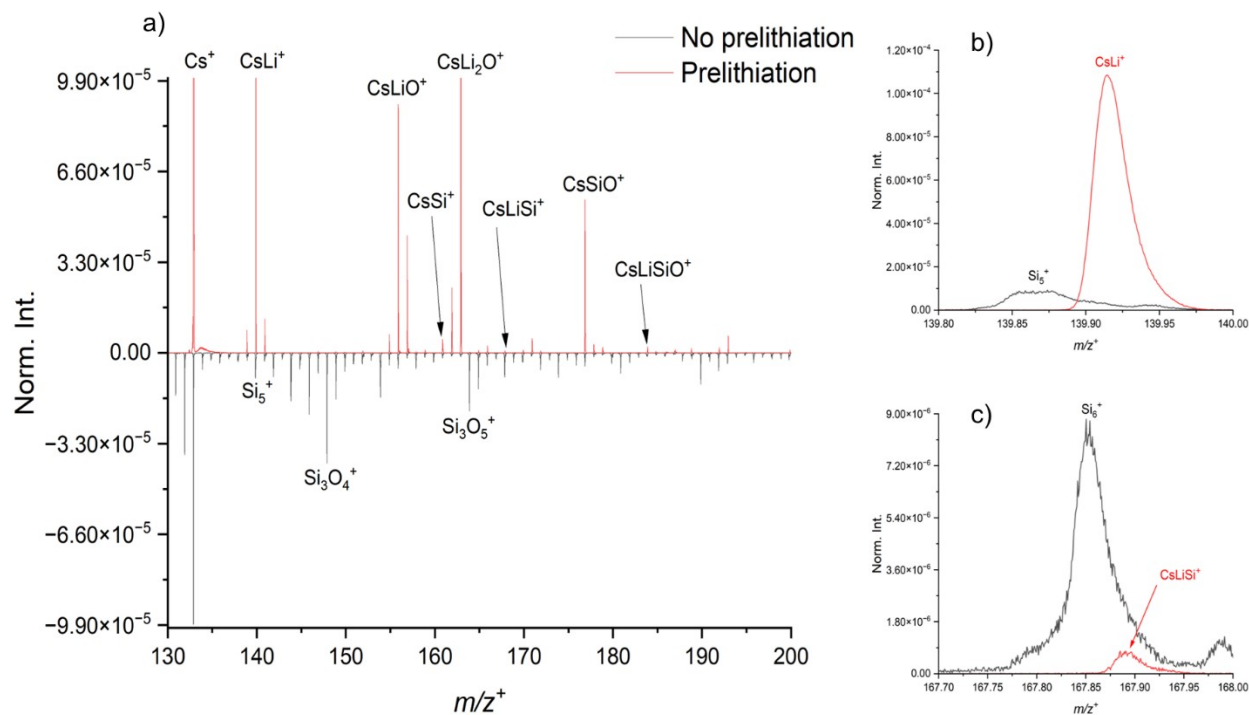

**Figure S7.** Normalized ToF-SIMS spectra of silicon electrodes with no prelithiation (black) and prelithiation within an Ar/CO<sub>2</sub> environment (red) using the CsM<sup>+</sup> ionization method. (a) Spectra in the  $m/z$  of 130-200 showing cesium, cesium -lithium, cesium -silicon, and cesium -lithium-silicon products of the electrodes. (b) Peak comparison of the lithium observed with no pre-lithiation and after prelithiation using the CsM<sup>+</sup> method. (c) Peak comparison of lithium-silicate with no prelithiation and after prelithiation using the CsM<sup>+</sup> method.

**Figure S7** shows normalized ToF-SIMS spectra reconstructed after depth profiling in the positive ion mode. This spectral comparison shows the principle of the CsM<sup>+</sup> method which utilizes the Cs sputter beam to attach to molecules of interest observed in **Figure S7a**. It is also shown that there is no CsLi<sup>+</sup> signal in the control sample, indicating that the products we observe in the prelithiation under Ar/CO<sub>2</sub> environment are a direct result of the thermal evaporation process, as seen in **Figure S7b**. Finally, we observe that lithium-silicon products are not found within the no prelithiation control silicon electrode sample, see **Figure S7c**.

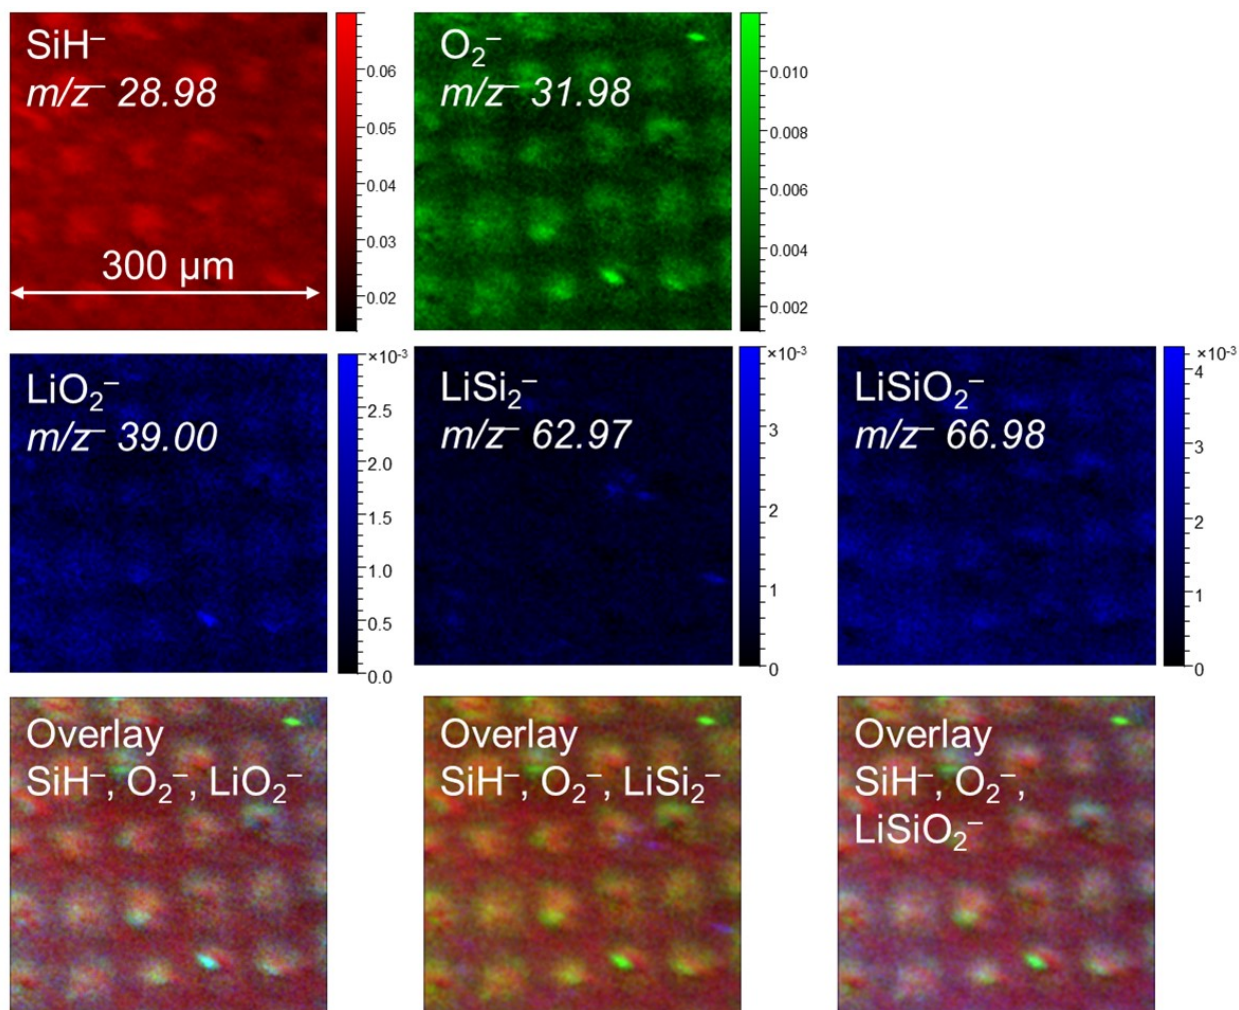

**Figure S8.** Red, green, blue overlay of  $\text{SiH}^-$ ,  $\text{O}_2^-$ , and  $\text{LiO}_2^-/\text{LiSi}_2^-/\text{LiSiO}_2^-$  showing negative areas in the images to be occupied by oxygen in the Ar gas environment prepared electrode sample.

**Figure S8** presents the 2D surface images of prelithiated electrodes after preparation in inert Ar gas environment with other peaks present filling the observed voids in the negative mode. These surface chemical maps substantiate the ‘mesh-like’ pattern of silicon on the surface where lithium signals tend to be more dispersed across the surface. The negative signal areas in the  $\text{LiO}_2^-$ ,  $\text{LiSi}_2^-$ , and  $\text{LiSiO}_2^-$  images are filled with  $\text{O}_2^-$ , indicating trapped oxygen. Oxygen indicates less formation of the  $\text{Li}_x\text{Si}_y$ ; and it supports the formation of  $\text{Li}_x\text{Si}_y\text{O}_z$  alloy in the designated areas provided by the mesh grid.

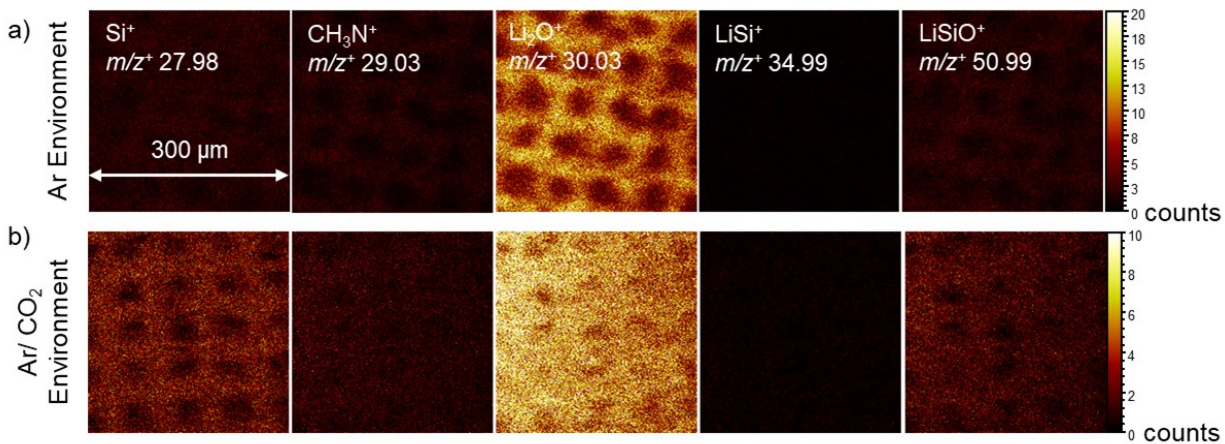

**Figure S9.** SIMS 2D images in the positive ion mode of electrodes prepared in argon gas environment (a) and Ar/CO<sub>2</sub> gas exposure (b). The analysis area is 300 μm x 300 μm. Their respective intensity scaling is to the right.

**Figure S9** presents the surface images of prelithiated electrodes after preparation in inert argon gas (a) and preparation in an Ar/CO<sub>2</sub> gas environment (b) in the positive mode. These surface images substantiate the ‘mesh-like’ pattern of silicon on the surface, where lithium signals tended to be more dispersed across the surface. These surface 2D images also highlight the presence of Li<sub>x</sub>Si<sub>y</sub> and Li<sub>x</sub>Si<sub>y</sub>O<sub>z</sub>.

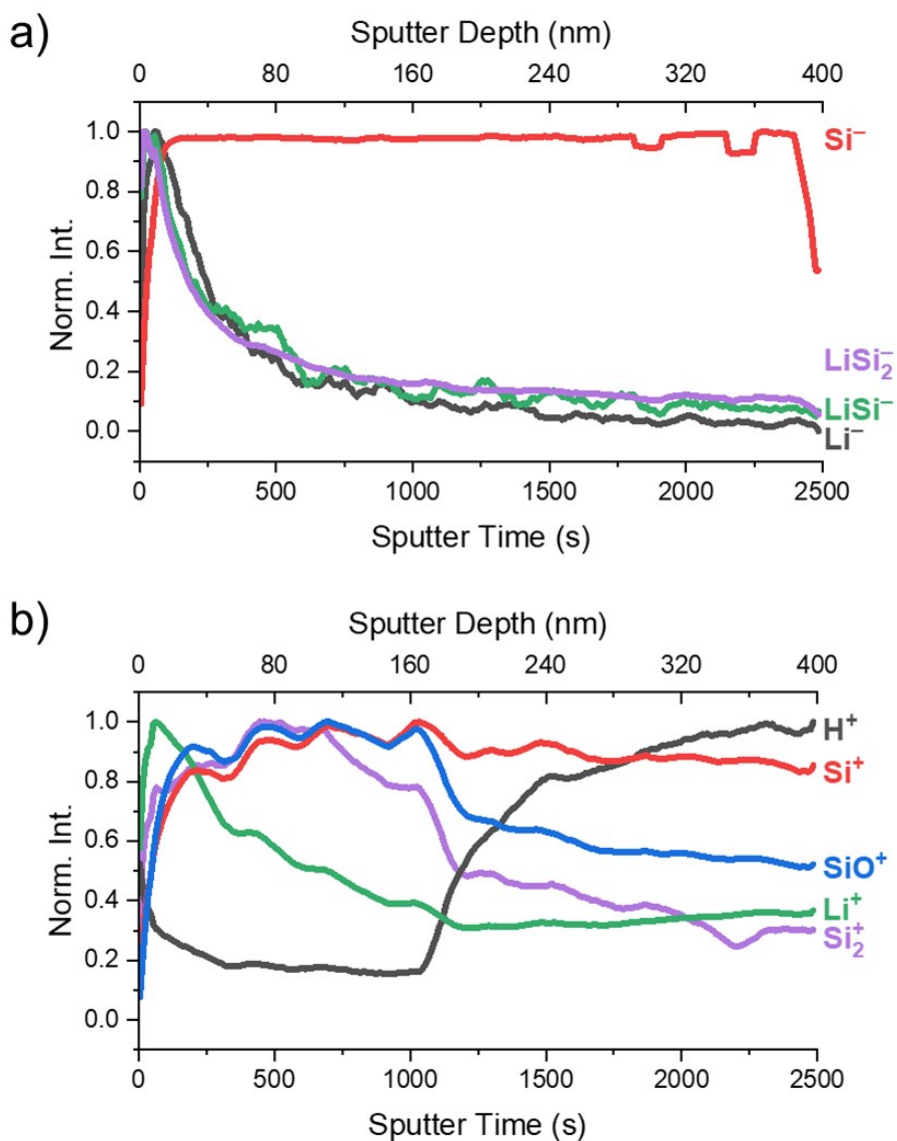

**Figure S10.** Depth profile plots of sample electrodes with no prelithiation in the negative mode (a) and positive mode (b).

**Figure S10** presents the depth profiles of the non-prelithiated electrode samples in the negative (a) and positive mode (b), respectively. Lithium peak can be found in the spectra and depth profiles of both positive and negative polarities; however, lithium and lithium alloys are depleted very quickly. These depth profiles show some lithium contamination was likely in the chamber, which led to some remnant lithium that was detected in large intensities in the positive mode. Even with small amounts of lithium, lithium is highly ionizable and readily observed in the spectra. The depletion of the lithium peak according to the depth profile indicates that the lithium was only at the surface of the electrode. Total sputtering depth was 400 nm. Sputtering done at 0.16 nm/s.

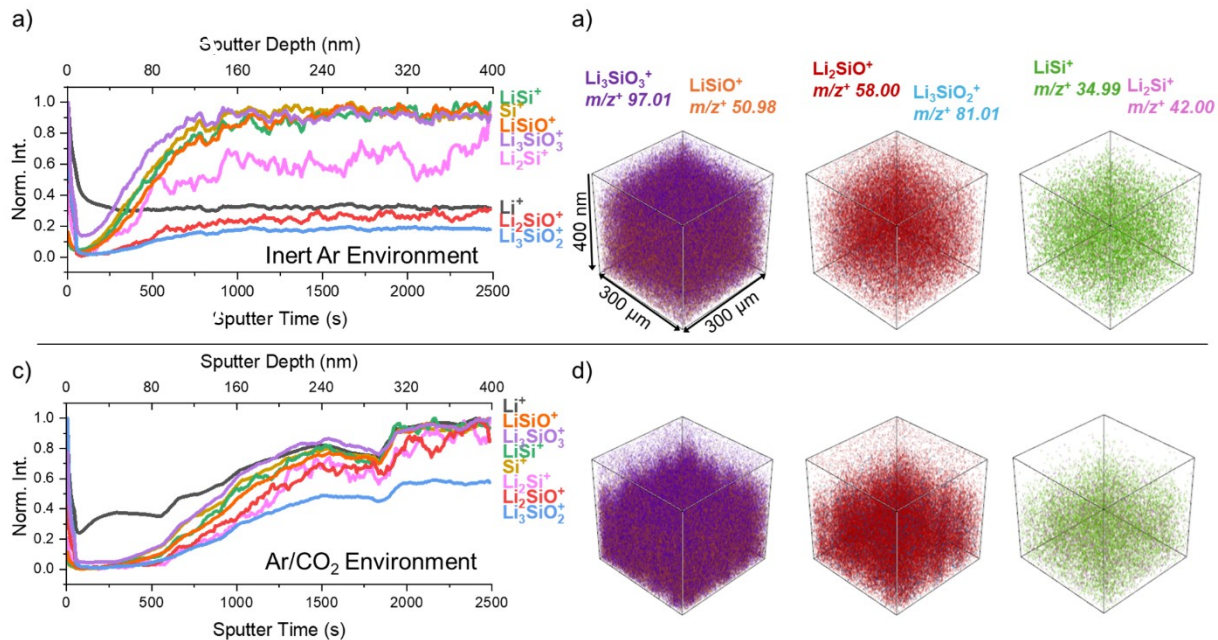

**Figure S11.** ToF-SIMS depth profiles and overlaying reconstructed 3D SIMS images of the prelithiated electrode materials after exposure to an inert Ar gas environment (a, b) and an Ar/CO<sub>2</sub> gas environment (c, d) in the positive ion mode. Total sputtering depth was 400 nm. Sputtering done at 0.16 nm/s. The same colors are used for identified ions in the depth profiles and 3D images.

**Figure S11** presents the depth profiles and overlaying reconstructed 3D SIMS images of the prelithiated electrode samples in the positive mode. Similar to the negative mode in **Figure 4**, both Li<sub>x</sub>Si<sub>y</sub>O<sub>z</sub> and Li<sub>x</sub>Si<sub>y</sub> compounds are highlighted to show the relative quantities and spatial distributions of lithium alloys and lithium silicates.

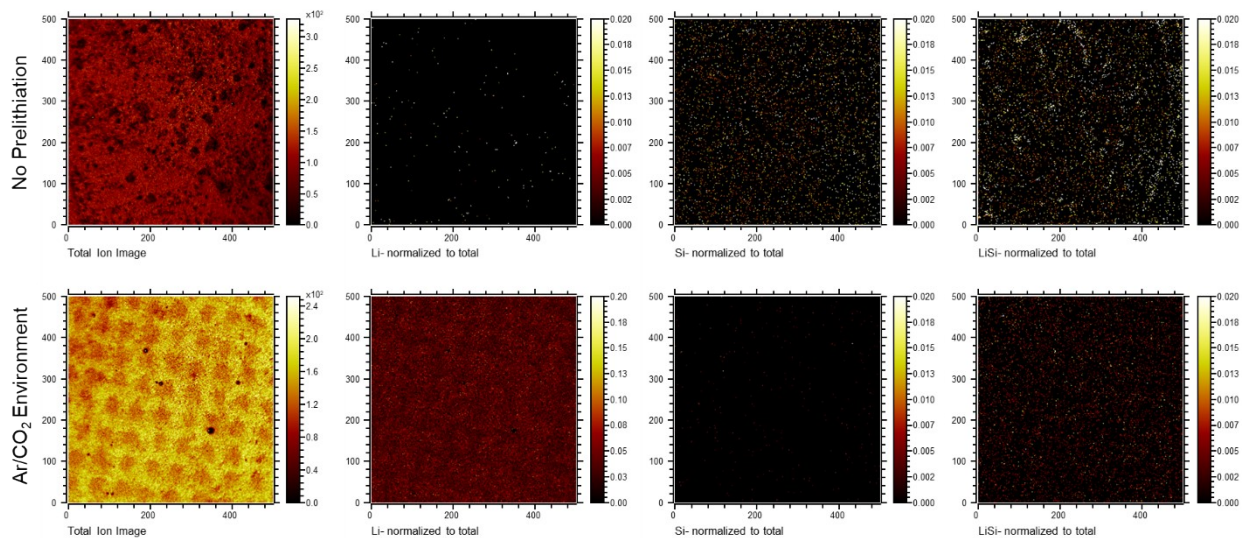

**Figure S12.** Negative polarity fast images of the anode sample surface for no prelithiation sample and Ar/CO<sub>2</sub> Environment sample showing Li, Si, and LiSi normalized to Total Ion Image within an area of 500  $\mu\text{m} \times 500 \mu\text{m}$ .

**Figure S12** provides 2D images of the sample surface for no prelithiation and Ar/CO<sub>2</sub> passivation anode samples in the negative polarity. High mass resolution spectroscopy mode was used throughout the remainder of the analysis. Imaging mode was not chosen due to low ionization counts within the selected region of interest.

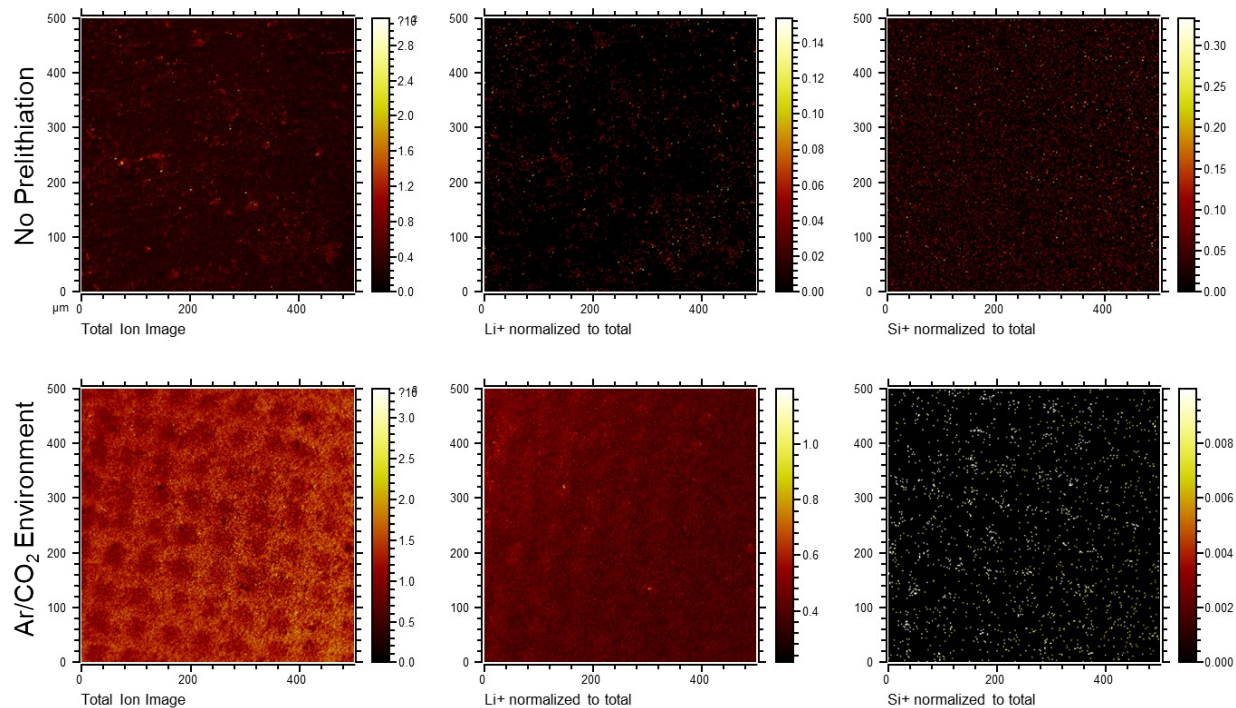

**Figure S13.** Positive polarity fast images of the anode sample surface for no prelithiation sample and Ar/CO<sub>2</sub> Environment sample showing Li and Si normalized to Total Ion Image within an area of 500 μm × 500 μm.

**Figure S13** provides 2D images of the sample surface for no prelithiation and Ar/CO<sub>2</sub> passivation anode samples in the positive polarity. High mass resolution spectroscopy mode was used throughout the remainder of the analysis. Imaging mode was not chosen due to low ionization counts within the selected region of interest.

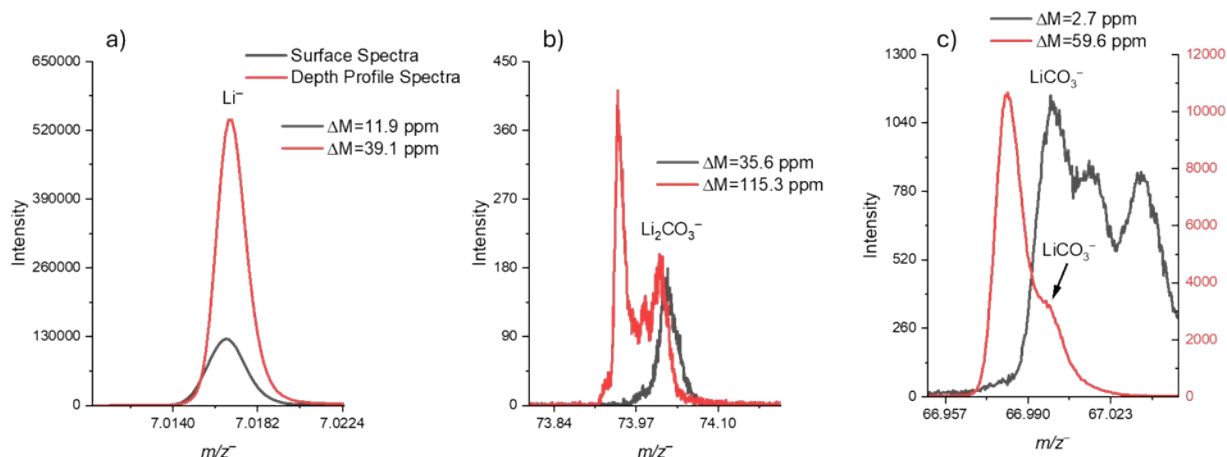

**Figure S14.** ToF-SIMS spectra showing Ar/CO<sub>2</sub> anode sample surface spectra (black) and depth profile spectra (red) to examine potential lithium carbonate peak identification. (a) Spectra observes Li<sup>-</sup>. (b) Spectra observed Li<sub>2</sub>CO<sub>3</sub><sup>-</sup> with a higher mass deviation for depth profile spectra. (c) Spectra observes prominent lithium carbonate fragment LiCO<sub>3</sub><sup>-</sup> is not readily observed in the depth profiling spectra.

**Figure S14** shows the surface spectra versus the depth profiling spectra for signs of lithium carbonate within the Ar/CO<sub>2</sub> sample. It is observed that the Li<sup>-</sup> peaks for the surface and the depth profile overlap, indicating proper calibration and peak identification. **Figure S14b** shows the lithium carbonate (Li<sub>2</sub>CO<sub>3</sub><sup>-</sup>) molecular spectral comparisons of both surface and depth profile. Here, the surface spectrum in blue has a relatively low mass deviation of 35.6 ppm, indicating that lithium carbonate is at the surface of the anode. However, mass deviation increases to 115.3 ppm from the depth profile reconstructed spectrum. This may indicate that lithium carbonate is no longer identifiable as it is outside our accepted mass deviation of 100 ppm.

Also, the ion counts (cts) for each of these peaks on the surface and from the depth profile are less than 500, which can introduce signal to noise concerns. However, since Li<sub>2</sub>CO<sub>3</sub> is the neutral ion, low counts are to be expected. To mitigate these possible interferences, we compare the main fragment, LiCO<sub>3</sub><sup>-</sup>, which would have a negative charge. In this case, we see a prominent peak with low mass deviation for the surface spectra, indicating lithium carbonate is present at the surface. Its high intensity indicates another peak for the depth profile spectra. However, it is unclear to denote LiCO<sub>3</sub><sup>-</sup> in the depth profile spectra. The SIMS spectral results show identification of lithium carbonate at the surface of the Ar/CO<sub>2</sub> anode as expected, offering possible signs of lithium carbonate into the bulk. Further analysis is required to identify lithium carbonate transport into the anode using materials that have gone through cycling.

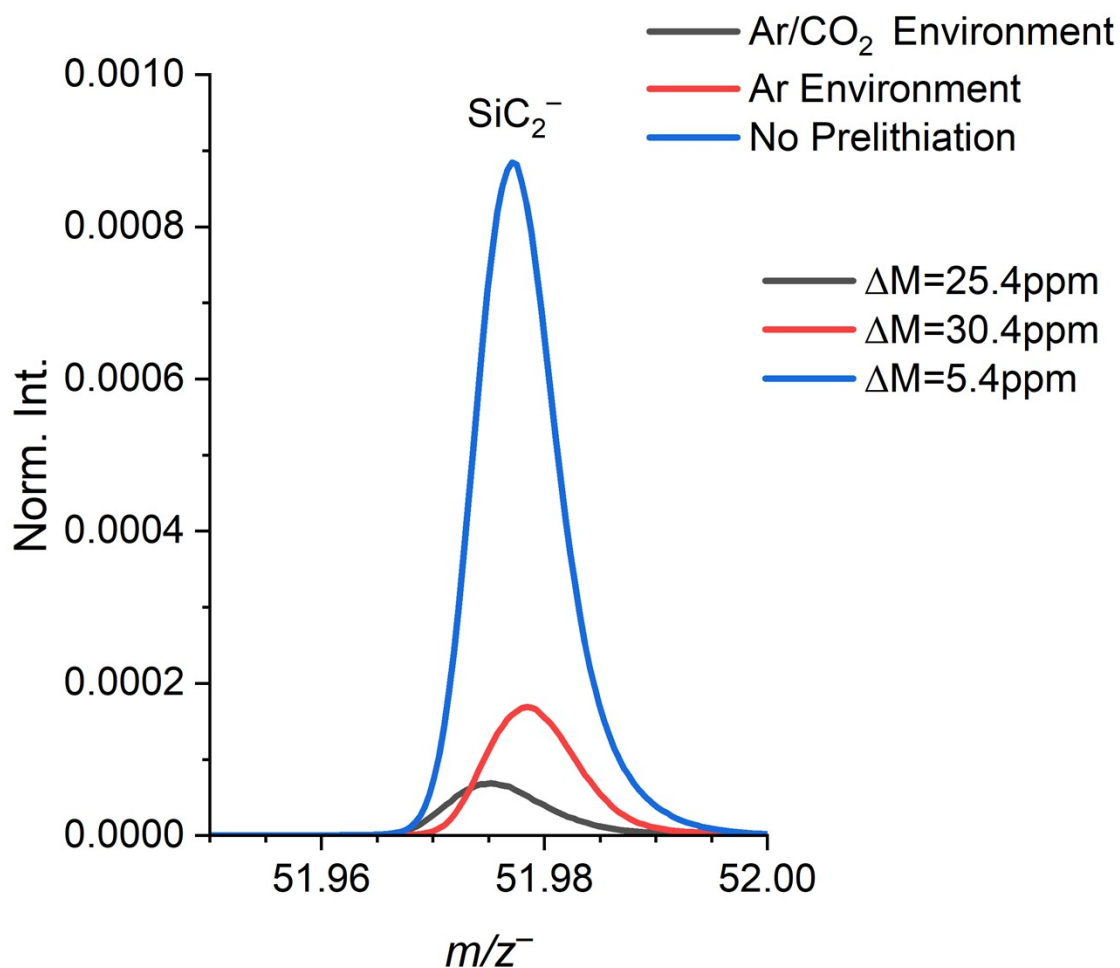

**Figure S15.** Normalized ToF-SIMS spectra showing comparison of  $\text{SiC}_2^-$  peak identification for Ar/CO<sub>2</sub> (black), Ar (red), and no prelithiation (blue) samples. Normalization is to total ion counts.

**Figure S15** shows ToF-SIMS spectra for  $\text{SiC}_2^-$  identification for the three samples. Notice that the highest peak intensity for the no prelithiation sample due to the high Si content of the anode. The Ar environment (red) shows the second highest peak intensity, and the Ar/CO<sub>2</sub> sample shows the lowest. It is possible that the silicon content is dependent on how well the prelithiation process proceeds, indicating lower  $\text{SiC}_2^-$  for the sample, which forms LiSi products closer to the sample surface.

## Supporting Tables

**Table S1:** Peak identifications for electrodes in inert Ar gas environment in mass range of  $m/z^-$  0 – 200 in the negative mode.

| $m/z^-_{\text{theo.}}$ | $m/z^-_{\text{obs.}}$ | $\Delta M$ , ppm | Species                                       | Assignment              | Ref       |
|------------------------|-----------------------|------------------|-----------------------------------------------|-------------------------|-----------|
| 1.0084                 | 1.0084                | 14.4919          | H <sup>-</sup>                                | Hydrogen                | 1         |
| 7.0164                 | 7.0166                | 25.4140          | Li <sup>-</sup>                               | Lithium                 | 2         |
| 12.0005                | 12.0005               | 6.6797           | C <sup>-</sup>                                | Carbon                  | 2         |
| 15.9960                | 15.9955               | 34.4293          | O <sup>-</sup>                                | Oxygen                  | 1         |
| 17.0028                | 17.0033               | 27.4558          | OH <sup>-</sup>                               | Hydroxide               | 1         |
| 18.9985                | 18.9990               | 22.6402          | F <sup>-</sup>                                | Fluorine                | 2         |
| 19.0162                | 19.0166               | 16.2238          | CLi <sup>-</sup>                              | Lithium Carbide         | This work |
| 23.0111                | 23.0115               | 16.8126          | LiO <sup>-</sup>                              | Lithium Oxide           | This work |
| 24.0008                | 24.0005               | 12.1750          | C <sub>2</sub> <sup>-</sup>                   | Carbon cluster          | 3         |
| 26.0040                | 26.0036               | 13.8899          | CN <sup>-</sup>                               | Cyanide                 | 4         |
| 27.9788                | 27.9775               | 45.8948          | Si <sup>-</sup>                               | Silicon                 | 5         |
| 29.9734                | 29.9743               | 29.6301          | <sup>30</sup> Si <sup>-</sup>                 | Silicon Isotope         | 6         |
| 31.0168                | 31.0166               | 9.4545           | LiC <sub>2</sub> <sup>-</sup>                 | Lithium Carbide         | This work |
| 31.9719                | 31.9726               | 22.1748          | S <sup>-</sup>                                | Sulfur                  | 7         |
| 31.9897                | 31.9904               | 22.3089          | O <sub>2</sub> <sup>-</sup>                   | Oxygen                  | 4         |
| 33.0207                | 33.0196               | 32.0080          | CNLi <sup>-</sup>                             | Lithium Cyanide         | 4         |
| 34.9687                | 34.9694               | 18.8991          | Cl <sup>-</sup>                               | Chlorine                | 7         |
| 34.9928                | 34.9935               | 20.4321          | LiSi <sup>-</sup>                             | Lithium Silicon Alloy   | This work |
| 36.0005                | 36.0005               | 0.2577           | C <sub>3</sub> <sup>-</sup>                   | Carbon cluster          | 3         |
| 39.0078                | 39.0064               | 37.5132          | LiO <sub>2</sub> <sup>-</sup>                 | Lithium Oxide           | 4         |
| 39.9753                | 39.9775               | 53.8363          | SiC <sup>-</sup>                              | Silicon Carbide         | 8         |
| 43.9723                | 43.9724               | 1.2760           | SiO <sup>-</sup>                              | Silicon Oxide           | 7         |
| 46.9954                | 46.9935               | 40.3351          | LiSiC <sup>-</sup>                            | Lithium Silicon Carbide | This work |
| 48.0016                | 48.0005               | 21.8377          | C <sub>4</sub> <sup>-</sup>                   | Carbon Cluster          | 3         |
| 50.9897                | 50.9884               | 25.9407          | LiSiO <sup>-</sup>                            | Lithium Silicate        | This work |
| 55.9546                | 55.9544               | 2.9967           | Si <sub>2</sub> <sup>-</sup>                  | Silicon Cluster         | 9         |
| 59.9685                | 59.9673               | 19.3491          | SiO <sub>2</sub> <sup>-</sup>                 | Silicate                | 1         |
| 62.9712                | 62.9704               | 12.0339          | LiSi <sub>2</sub> <sup>-</sup>                | Lithium Silicon Alloy   | This work |
| 66.9860                | 66.9833               | 40.1563          | LiSiO <sub>2</sub> <sup>-</sup>               | Lithium Silicate        | This work |
| 75.9651                | 75.9622               | 38.1093          | SiO <sub>3</sub> <sup>-</sup>                 | Silicate                | 7         |
| 78.9670                | 78.9653               | 21.8536          | LiSi <sub>2</sub> O <sup>-</sup>              | Lithium Silicate        | This work |
| 82.9820                | 82.9782               | 45.3584          | LiSiO <sub>3</sub> <sup>-</sup>               | Lithium Silicate        | This work |
| 83.9313                | 83.9313               | 0.7948           | Si <sub>3</sub> <sup>-</sup>                  | Silicon Cluster         | 10        |
| 90.9477                | 90.9473               | 4.1176           | LiSi <sub>3</sub> <sup>-</sup>                | Lithium Silicon Alloy   | This work |
| 97.0131                | 97.0102               | 30.0005          | Li <sub>3</sub> SiO <sub>3</sub> <sup>-</sup> | Lithium Silicate        | This work |
| 111.9088               | 111.9083              | 4.8205           | Si <sub>4</sub> <sup>-</sup>                  | Silicon Cluster         | 10        |
| 132.9079               | 132.9060              | 14.0961          | Cs <sup>-</sup>                               | Cesium                  | 11        |
| 139.8885               | 139.8852              | 23.3964          | Si <sub>5</sub> <sup>-</sup>                  | Silicon Cluster         | 10        |
| 160.8810               | 160.8829              | 11.9964          | SiCs <sup>-</sup>                             | Silicon Cesium          | 11        |
| 188.8617               | 188.8598              | 9.6859           | Si <sub>2</sub> Cs <sup>-</sup>               | Silicon Cesium          | This work |

Note:  $m/z^-$  represents the mass-to-charge ratio for negatively charged ions.

<sup>a</sup>  $m/z^-_{\text{obs.}}$  represents the observed mass to charge ratio.

<sup>b</sup>  $m/z^-_{\text{theo.}}$  represents the theoretical mass to charge ratio.

<sup>c</sup>  $\Delta M = 10^6 \times (m/z^-_{\text{obs.}} - m/z^-_{\text{theo.}}) / m/z^-_{\text{theo.}}$  (expressed in ppm).<sup>12</sup>

Peak identification are possibilities identified by SurfaceSpectra software and cross-referenced to literature.

**Table S2:** Peak identifications for electrodes in Ar/CO<sub>2</sub> gas environment in mass range of  $m/z^-$  0 – 200 in the negative mode.

| $m/z^-_{\text{theo.}}$ | $m/z^-_{\text{obs.}}$ | $\Delta M$ , ppm | Species                                       | Assignment                                   | Ref       |
|------------------------|-----------------------|------------------|-----------------------------------------------|----------------------------------------------|-----------|
| 1.0084                 | 1.0084                | 16.2118          | H <sup>-</sup>                                | Hydrogen                                     | 1         |
| 7.0166                 | 7.0166                | 0.1463           | Li <sup>-</sup>                               | Lithium                                      | 2         |
| 15.9956                | 15.9955               | 9.9358           | O <sup>-</sup>                                | Oxygen                                       | 1         |
| 17.0035                | 17.0033               | 10.524           | OH <sup>-</sup>                               | Hydroxide                                    | 1         |
| 18.9984                | 18.9990               | 29.2127          | F <sup>-</sup>                                | Fluorine                                     | 2         |
| 19.0163                | 19.0166               | 15.8421          | CLi <sup>-</sup>                              | Lithium Carbide                              | This work |
| 23.0112                | 23.0115               | 10.2757          | LiO <sup>-</sup>                              | Lithium Oxide                                | This work |
| 24.0008                | 24.0005               | 9.0876           | C <sub>2</sub> <sup>-</sup>                   | Carbon Cluster                               | 3         |
| 26.0043                | 26.0036               | 24.6088          | CN <sup>-</sup>                               | Cyanide                                      | 3         |
| 27.9785                | 27.9775               | 37.0930          | Si <sup>-</sup>                               | Silicon                                      | 5         |
| 29.9737                | 29.9743               | 20.5537          | <sup>30</sup> Si <sup>-</sup>                 | Silicon Isotope                              | 6         |
| 31.9902                | 31.9904               | 4.6790           | O <sub>2</sub> <sup>-</sup>                   | Oxygen                                       | 5         |
| 33.0214                | 33.0196               | 54.9510          | CNLi <sup>-</sup>                             | Lithium Cyanide                              | 5         |
| 34.9694                | 34.9694               | 0.0307           | Cl <sup>-</sup>                               | Chlorine                                     | 7         |
| 34.9931                | 34.9935               | 11.1301          | LiSi <sup>-</sup>                             | Lithium Silicon Alloy                        | This work |
| 36.0011                | 36.0005               | 15.5977          | C <sub>3</sub> <sup>-</sup>                   | Carbon Cluster                               | 3         |
| 39.0054                | 39.0064               | 24.4797          | LiO <sub>2</sub> <sup>-</sup>                 | Lithium Oxide                                | 4         |
| 39.9752                | 39.9775               | 56.2839          | SiC <sup>-</sup>                              | Silicon Carbide                              | 8         |
| 43.9707                | 43.9724               | 38.976           | SiO <sup>-</sup>                              | Silicon Oxide                                | 7         |
| 43.9900                | 43.9904               | 8.6135           | CO <sub>2</sub> <sup>-</sup>                  | Carbon Dioxide                               | 4         |
| 50.9907                | 50.9884               | 46.1284          | LiSiO <sup>-</sup>                            | Lithium Silicate                             | This work |
| 55.9547                | 55.9544               | 5.0058           | Si <sub>2</sub> <sup>-</sup>                  | Silicon Cluster                              | 9         |
| 59.9694                | 59.9673               | 34.2293          | SiO <sub>2</sub> <sup>-</sup>                 | Silicate                                     | 1         |
| 62.9720                | 62.9704               | 25.4692          | LiSi <sub>2</sub> <sup>-</sup>                | Lithium Silicon Alloy                        | This work |
| 66.9891                | 66.9833               | 86.9175          | LiSiO <sub>2</sub> <sup>-</sup>               | Lithium Silicate                             | This work |
| 78.9689                | 78.9653               | 45.9164          | LiSi <sub>2</sub> O <sup>-</sup>              | Lithium Silicate                             | This work |
| 82.9836                | 82.9782               | 64.3833          | LiSiO <sub>3</sub> <sup>-</sup>               | Lithium Silicate                             | This work |
| 83.9317                | 83.9313               | 4.3595           | Si <sub>3</sub> <sup>-</sup>                  | Silicon Cluster                              | 10        |
| 90.9488                | 90.9473               | 16.2503          | LiSi <sub>3</sub> <sup>-</sup>                | Lithium Silicon Alloy                        | This work |
| 97.0165                | 97.0102               | 64.6421          | Li <sub>3</sub> SiO <sub>3</sub> <sup>-</sup> | Lithium Silicate                             | This work |
| 111.9098               | 111.9083              | 14.1239          | Si <sub>4</sub> <sup>-</sup>                  | Silicon Cluster                              | 10        |
| 120.0143               | 120.0212              | 56.9265          | Li <sub>4</sub> SiO <sub>4</sub> <sup>-</sup> | Lithium Silicate                             | This work |
| 132.9072               | 132.9060              | 8.9012           | Cs <sup>-</sup>                               | Cesium                                       | 11        |
| 160.8819               | 160.8829              | 6.6668           | SiCs <sup>-</sup>                             | Silicon Cesium                               | 11        |
| 174.9095               | 174.9149              | 31.255           | CsLi <sub>2</sub> Si <sup>-</sup>             | Cesium Li <sub>x</sub> Si <sub>y</sub> Alloy | This work |

Note:  $m/z^-$  represents the mass-to-charge ratio for negatively charged ions.

<sup>a</sup>  $m/z^-_{\text{obs.}}$  represents the observed mass to charge ratio.

<sup>b</sup>  $m/z^-_{\text{theo.}}$  represents the theoretical mass to charge ratio.

<sup>c</sup>  $\Delta M = 10^6 \times (m/z^-_{\text{obs.}} - m/z^-_{\text{theo.}}) / m/z^-_{\text{theo.}}$  (expressed in ppm).<sup>12</sup>

Peak identification are possibilities identified by SurfaceSpectra software and cross-referenced to literature.

**Table S3:** Peak identifications for electrodes with no prelithiation done in mass range of  $m/z^-$  0 – 200 in the negative mode.

| $m/z^-_{\text{theo.}}$ | $m/z^-_{\text{obs.}}$ | $\Delta M$ , ppm | Species                        | Assignment      | Ref       |
|------------------------|-----------------------|------------------|--------------------------------|-----------------|-----------|
| 1.0083                 | 1.0084                | 100.9281         | H <sup>-</sup>                 | Hydrogen        | 1         |
| 7.0161                 | 7.0166                | 70.7735          | Li <sup>-</sup>                | Lithium         | 2         |
| 13.0082                | 13.0084               | 17.2199          | CH <sup>-</sup>                | Hydrocarbon     | 2         |
| 15.9956                | 15.9955               | 9.2559           | O <sup>-</sup>                 | Oxygen          | 1         |
| 17.0030                | 17.0033               | 17.8075          | OH <sup>-</sup>                | Hydroxide       | 1         |
| 18.9985                | 18.9990               | 24.9460          | F <sup>-</sup>                 | Fluorine        | 2         |
| 24.0024                | 24.0005               | 75.1959          | C <sub>2</sub> <sup>-</sup>    | Carbon Cluster  | 3         |
| 26.0055                | 26.0036               | 71.3543          | CN <sup>-</sup>                | Cyanide         | 3         |
| 27.9790                | 27.9775               | 54.5032          | Si <sup>-</sup>                | Silicon         | 5         |
| 28.9840                | 28.9853               | 46.3908          | SiH <sup>-</sup>               | Silicon Hydride | 5         |
| 29.9738                | 29.9743               | 18.8002          | <sup>30</sup> Si <sup>-</sup>  | Silicon Isotope | 6         |
| 31.9719                | 31.9726               | 23.7079          | S <sup>-</sup>                 | Sulfur          | 7         |
| 31.9896                | 31.9904               | 23.2316          | O <sub>2</sub> <sup>-</sup>    | Oxygen          | 4         |
| 34.9691                | 34.9694               | 7.2828           | Cl <sup>-</sup>                | Chlorine        | 7         |
| 36.0014                | 36.0005               | 23.2918          | C <sub>3</sub> <sup>-</sup>    | Carbon Cluster  | 3         |
| 39.9765                | 39.9775               | 25.4998          | SiC <sup>-</sup>               | Silicon Carbide | 8         |
| 55.9573                | 55.9544               | 51.3752          | Si <sub>2</sub> <sup>-</sup>   | Silicon Cluster | 9         |
| 59.9677                | 59.9673               | 6.6495           | SiO <sub>2</sub> <sup>-</sup>  | Silicate        | 1         |
| 67.9560                | 67.9544               | 23.8694          | Si <sub>2</sub> C <sup>-</sup> | Silicon Carbide | This work |
| 83.9333                | 83.9313               | 23.2241          | Si <sub>3</sub> <sup>-</sup>   | Silicon Cluster | 10        |
| 111.9110               | 111.9083              | 24.1890          | Si <sub>4</sub> <sup>-</sup>   | Silicon Cluster | 10        |
| 132.9092               | 132.9060              | 23.8794          | Cs <sup>-</sup>                | Cesium          | 11        |
| 139.8896               | 139.8852              | 31.7450          | Si <sub>5</sub> <sup>-</sup>   | Silicon Cluster | 10        |
| 156.9097               | 156.9060              | 23.2884          | CsC <sub>2</sub> <sup>-</sup>  | Cesium Carbide  | This work |
| 158.9142               | 158.9091              | 32.2227          | CsCN <sup>-</sup>              | Cesium Cyanide  | This work |
| 160.8832               | 160.8829              | 1.8890           | SiCs <sup>-</sup>              | Silicon Cesium  | 10        |
| 167.8700               | 167.8621              | 47.2800          | Si <sub>6</sub> <sup>-</sup>   | Silicon Cluster | 10        |

Note:  $m/z^-$  represents the mass-to-charge ratio for negatively charged ions.

<sup>a</sup>  $m/z^-_{\text{obs.}}$  represents the observed mass to charge ratio.

<sup>b</sup>  $m/z^-_{\text{theo.}}$  represents the theoretical mass to charge ratio.

<sup>c</sup>  $\Delta M$ :  $\Delta M = 10^6 \times (m/z^-_{\text{obs.}} - m/z^-_{\text{theo.}}) / m/z^-_{\text{theo.}}$  (expressed in ppm).<sup>12</sup>

Peak identification are possibilities identified by SurfaceSpectra software and cross-referenced to literature.

**Table S4:** Peak identifications for electrodes exposed to inert Ar gas environment in mass range of  $m/z^+ 0 - 200$  in the positive mode.

| $m/z^+_{\text{theo.}}$ | $m/z^-_{\text{obs.}}$ | $\Delta M, \text{ppm}$ | Species                     | Assignment            | Ref       |
|------------------------|-----------------------|------------------------|-----------------------------|-----------------------|-----------|
| 6.0153                 | 6.0146                | 122.3005               | ${}^6\text{Li}^+$           | Lithium Isotope       | 13        |
| 7.0164                 | 7.0155                | 135.8829               | $\text{Li}^+$               | Lithium               | 2         |
| 12.0002                | 11.9995               | 65.8887                | $\text{C}^+$                | Carbon                | 2         |
| 14.0320                | 14.0315               | 41.1303                | $\text{Li}_2^+$             | Lithium Cluster       | 2         |
| 19.0162                | 19.0155               | 41.4251                | $\text{CLi}^+$              | Lithium Carbide       | This work |
| 27.9774                | 27.9764               | 37.7093                | $\text{Si}^+$               | Silicon               | 5         |
| 30.0272                | 30.0264               | 26.4020                | $\text{Li}_2\text{O}^+$     | Lithium Oxide         | 2         |
| 34.9931                | 34.9924               | 20.2620                | $\text{LiSi}^+$             | Lithium Silicon Alloy | This work |
| 37.0447                | 37.0424               | 61.9418                | $\text{Li}_3\text{O}^+$     | Lithium Oxide         | 2         |
| 42.0113                | 42.0084               | 68.4337                | $\text{Li}_2\text{Si}^+$    | Lithium Silicon Alloy | This work |
| 43.9708                | 43.9713               | 11.3907                | $\text{SiO}^+$              | Silicon Oxide         | 6         |
| 50.9886                | 50.9873               | 25.9150                | $\text{LiSiO}^+$            | Lithium Silicate      | This work |
| 55.9541                | 55.9533               | 14.4007                | $\text{Si}_2^+$             | Silicon Cluster       | 7         |
| 58.0039                | 58.0033               | 10.8447                | $\text{Li}_2\text{SiO}^+$   | Lithium Silicate      | This work |
| 67.0689                | 67.0693               | 5.5780                 | $\text{Li}_5\text{O}_2^+$   | Lithium Oxide         | This work |
| 81.0177                | 81.0142               | 42.9459                | $\text{Li}_3\text{SiO}_2^+$ | Lithium Silicate      | This work |
| 97.0107                | 97.0091               | 16.1818                | $\text{Li}_3\text{SiO}_3^+$ | Lithium Silicate      | This work |
| 132.9180               | 132.9049              | 98.6203                | $\text{Cs}^+$               | Cesium                | 11        |
| 139.9194               | 139.9209              | 10.9323                | $\text{CsLi}^+$             | Cesium Lithium        | This work |
| 160.8826               | 160.8818              | 4.6036                 | $\text{SiCs}^+$             | Cesium Silicon        | 11        |
| 162.9299               | 162.9318              | 11.9185                | $\text{CsLi}_2\text{O}^+$   | Cesium Lithium Oxide  | This work |
| 176.8771               | 176.8767              | 2.0917                 | $\text{SiOCs}^+$            | Cesium Silicon Oxide  | This work |

Note:  $m/z^+$  represents the mass-to-charge ratio for negatively charged ions.

<sup>a</sup>  $m/z^+_{\text{obs.}}$  represents the observed mass to charge ratio.

<sup>b</sup>  $m/z^+_{\text{theo.}}$  represents the theoretical mass to charge ratio.

<sup>c</sup>  $\Delta M$ :  $\Delta M = 10^6 \times (m/z^+_{\text{obs.}} - m/z^+_{\text{theo.}}) / m/z^+_{\text{theo.}}$  (expressed in ppm).<sup>12</sup>

Peak identification are possibilities identified by SurfaceSpectra software and cross-referenced to literature.

**Table S5:** Peak identifications for electrodes exposed to Ar/CO<sub>2</sub> gas environment in mass range of  $m/z^+ 0 - 200$  in the positive mode.

| $m/z^+_{theo.}$ | $m/z^+_{obs.}$ | $\Delta M, ppm$ | Species                                       | Assignment            | Ref       |
|-----------------|----------------|-----------------|-----------------------------------------------|-----------------------|-----------|
| 1.0073          | 1.0073         | 428.3205        | H <sup>+</sup>                                | Hydrogen              | 7         |
| 6.0149          | 6.0146         | 186.7328        | <sup>6</sup> Li <sup>+</sup>                  | Lithium Isotope       | 13        |
| 7.0160          | 7.0155         | 195.4347        | Li <sup>+</sup>                               | Lithium               | 2         |
| 11.9997         | 11.9995        | 85.0338         | C <sup>+</sup>                                | Carbon                | 2         |
| 14.0316         | 14.0315        | 61.6241         | Li <sub>2</sub> <sup>+</sup>                  | Lithium Cluster       | 2         |
| 23.0103         | 23.0104        | 17.9083         | LiO <sup>+</sup>                              | Lithium Oxide         | This work |
| 27.9767         | 27.9764        | 22.4159         | Si <sup>+</sup>                               | Silicon               | 5         |
| 30.0269         | 30.0264        | 27.2281         | Li <sub>2</sub> O <sup>+</sup>                | Lithium Oxide         | 2         |
| 34.9922         | 34.9924        | 2.2904          | LiSi <sup>+</sup>                             | Lithium Silicon Alloy | This work |
| 37.0461         | 37.0424        | 99.2428         | Li <sub>3</sub> O <sup>+</sup>                | Lithium Oxide         | 2         |
| 42.0103         | 42.0084        | 40.2687         | Li <sub>2</sub> Si <sup>+</sup>               | Lithium Silicon Alloy | This work |
| 49.0258         | 49.0244        | 17.6853         | Li <sub>3</sub> Si <sup>+</sup>               | Lithium Silicon Alloy | This work |
| 50.9882         | 50.9873        | 4.4845          | LiSiO <sup>+</sup>                            | Lithium Silicate      | This work |
| 55.9527         | 55.9533        | 27.3037         | Si <sub>2</sub> <sup>+</sup>                  | Silicon cluster       | 9         |
| 58.0050         | 58.0033        | 10.4530         | Li <sub>2</sub> SiO <sup>+</sup>              | Lithium Silicate      | This work |
| 67.0738         | 67.0693        | 43.8250         | Li <sub>3</sub> O <sub>2</sub> <sup>+</sup>   | Lithium Oxide         | This work |
| 81.0180         | 81.0155        | 16.2837         | Li <sub>3</sub> SiO <sub>2</sub> <sup>+</sup> | Lithium Silicate      | This work |
| 89.9958         | 89.9931        | 1.7362          | Li <sub>2</sub> SiO <sub>3</sub> <sup>+</sup> | Lithium Silicate      | This work |
| 97.0119         | 97.0104        | 5.7104          | Li <sub>3</sub> SiO <sub>3</sub> <sup>+</sup> | Lithium Silicate      | This work |
| 120.0221        | 120.0201       | 21.8224         | Li <sub>4</sub> SiO <sub>4</sub> <sup>+</sup> | Lithium Silicate      | This work |
| 132.9208        | 132.9049       | 76.6152         | Cs <sup>+</sup>                               | Cesium                | 11        |
| 139.9213        | 139.9209       | 41.2667         | CsLi <sup>+</sup>                             | Cesium Lithium        | This work |
| 155.9168        | 155.9158       | 40.1924         | CsLiO <sup>+</sup>                            | Cesium Lithium Oxide  | This work |
| 160.8900        | 160.8818       | 3.6907          | SiCs <sup>+</sup>                             | Silicon Cesium        | 11        |
| 176.8810        | 176.8767       | 25.5815         | SiOCs <sup>+</sup>                            | Cesium Silicon Oxide  | This work |

Note:  $m/z^+$  represents the mass-to-charge ratio for negatively charged ions.

<sup>a</sup>  $m/z^+_{obs.}$  represents the observed mass to charge ratio.

<sup>b</sup>  $m/z^+_{theo.}$  represents the theoretical mass to charge ratio.

<sup>c</sup>  $\Delta M = 10^6 \times (m/z^+_{obs.} - m/z^+_{theo.}) / m/z^+_{theo.}$  (expressed in ppm).<sup>20</sup>

Peak identification are possibilities identified by SurfaceSpectra software and cross-referenced to literature.

**Table S6:** Peak identifications for electrodes with no prelithiation done in mass range of  $m/z^+$  0 – 200 in the positive mode.

| $m/z^+$ <sub>theo.</sub> | $m/z^-$ <sub>obs.</sub> | $\Delta M$ , ppm | Species                                    | Assignment             | Ref       |
|--------------------------|-------------------------|------------------|--------------------------------------------|------------------------|-----------|
| 1.0076                   | 1.0073                  | 297.3367         | H <sup>+</sup>                             | Hydrogen               | 3         |
| 7.0162                   | 7.0155                  | 100.6255         | Li <sup>+</sup>                            | Lithium                | 2         |
| 8.0239                   | 8.0233                  | 77.3767          | LiH <sup>+</sup>                           | Lithium Hydride        | 4         |
| 12.0003                  | 11.9995                 | 74.1822          | C <sup>+</sup>                             | Carbon                 | 2         |
| 15.0241                  | 15.0229                 | 76.2118          | CH <sub>3</sub> <sup>+</sup>               | Hydrocarbon            | 2         |
| 15.9952                  | 15.9944                 | 53.2683          | O <sup>+</sup>                             | Oxygen                 | 1         |
| 17.0028                  | 17.0022                 | 33.6237          | OH <sup>+</sup>                            | Hydroxide              | 1         |
| 22.9902                  | 22.9892                 | 42.4414          | Na <sup>+</sup>                            | Sodium                 | 7         |
| 24.0000                  | 23.9995                 | 24.8880          | C <sub>2</sub> <sup>+</sup>                | Carbon Cluster         | 3         |
| 27.9784                  | 27.9764                 | 73.6707          | Si <sup>+</sup>                            | Silicon                | 5         |
| 28.9843                  | 28.9842                 | 1.9659           | SiH <sup>+</sup>                           | Silicon Hydride        | 5         |
| 29.9741                  | 29.9732                 | 29.0097          | <sup>30</sup> Si <sup>+</sup>              | Silicon Isotope        | 6         |
| 31.9899                  | 31.9893                 | 20.6040          | O <sub>2</sub> <sup>+</sup>                | Oxygen                 | 4         |
| 34.9925                  | 34.9924                 | 2.5149           | LiSi <sup>+</sup>                          | Lithium Silicon Alloy  | This work |
| 35.9998                  | 35.9995                 | 10.6078          | C <sub>3</sub> <sup>+</sup>                | Carbon Cluster         | 3         |
| 38.9627                  | 38.9632                 | 12.7609          | K <sup>+</sup>                             | Potassium              | 14        |
| 39.9605                  | 39.9620                 | 37.9885          | Ca <sup>+</sup>                            | Calcium                | 14        |
| 41.0412                  | 41.0386                 | 62.9338          | C <sub>3</sub> H <sub>5</sub> <sup>+</sup> | Hydrocarbon            | 5         |
| 43.9705                  | 43.9713                 | 17.1068          | SiO <sup>+</sup>                           | Silicon Oxide          | 7         |
| 53.9809                  | 53.9795                 | 26.3407          | SiCN <sup>+</sup>                          | Silicon Carbon Nitride | This work |
| 59.9656                  | 59.9662                 | 9.6435           | SiO <sub>2</sub> <sup>+</sup>              | Silicate               | 1         |
| 83.9297                  | 83.9302                 | 6.2940           | Si <sub>3</sub> <sup>+</sup>               | Silicon Cluster        | 10        |
| 111.9013                 | 111.9072                | 52.7227          | Si <sub>4</sub> <sup>+</sup>               | Silicon Cluster        | 10        |
| 132.9036                 | 132.9049                | 9.9765           | Cs <sup>+</sup>                            | Cesium                 | 11        |

Note:  $m/z^+$  represents the mass-to-charge ratio for negatively charged ions.

<sup>a</sup>  $m/z^+$ <sub>obs.</sub> represents the observed mass to charge ratio.

<sup>b</sup>  $m/z^+$ <sub>theo.</sub> represents the theoretical mass to charge ratio.

<sup>c</sup>  $\Delta M$ :  $\Delta M = 10^6 \times (m/z^+_{obs.} - m/z^+_{theo.}) / m/z^+_{theo.}$  (expressed in ppm).<sup>12</sup>

Peak identification are possibilities identified by SurfaceSpectra software and cross-referenced to literature.

## References

1. L. Yang, Y.-Y. Lua, G. Jiang, B. J. Tyler and M. R. Linford, *Analytical Chemistry*, 2005, **77**, 4654-4661.
2. N. Gauthier, C. Courrèges, J. Demeaux, C. Tessier and H. Martinez, *Appl. Surf. Sci.*, 2020, **501**, 144266.
3. N. Mayama, Y. Miura, K. Misawa, A. Takami, T. Sakamoto and M. Fujii, *Anal. Sci.*, 2013, **29**, 479-482.
4. Y. Zhao, S.-K. Otto, T. Lombardo, A. Henss, A. Koeppel, M. Selzer, J. Janek and B. Nestler, *ACS Appl. Mater. Interfaces.*, 2023, **15**, 50469-50478.
5. V. A. Brown, D. A. Barrett, P. N. Shaw, M. C. Davies, H. J. Ritchie, P. Ross, A. J. Paul and J. F. Watts, *Surf. Interface Anal.*, 1994, **21**, 263-273.
6. M. N. Drozdov, Y. N. Drozdov, D. A. Pryakhin, V. I. Shashkin, P. G. Sennikov and H.-J. Pohl, *Bull. Russ. Acad. Sci.: Phys.*, 2010, **74**, 75-77.
7. A. Rossi, B. Elsener, G. Hähner, M. Textor and N. D. Spencer, *Surf. Interface Anal.*, 2000, **29**, 460-467.
8. S. Richter, K. Kaufmann and C. Hagendorf, *Phys. Status Solidi C*, 2011, **8**, 796-799.
9. A. Benninghoven, *Angew. Chem. Int. Ed.*, 1994, **33**, 1023-1043.
10. M. Perego, S. Ferrari, M. Fanciulli, G. Ben Assayag, C. Bonafos, M. Carrada and A. Claverie, *SIMS XIV*, 2004, **231-232**, 813-816.
11. J. Brison, R. G. Vitchev and L. Houssiau, *Nucl. Instrum. Methods Phys. Res., B*, 2008, **266**, 5159-5165.
12. X.-Y. Yu, C. Yang, J. Gao, J. Xiong, X. Sui, L. Zhong, Y. Zhang and J. Son, *Front. Chem.*, 2023, **11**, 1253685.
13. X.-Y. Yu, J. Yao, B. Matthews, S. R. Spurgeon, S. Riechers, G. Sevigny, Z. Zhu, W. Jiang and W. Luscher, *J. Mater. Res. Technol.*, 2021, **14**, 475-483.
14. M. A. Douglas and P. J. Chen, *Surf. Interface Anal.*, 1998, **26**, 984-994.
